# Supplementary material
Source: HighWire-hosted journal article supplement (https://fn.bmj.com/highwire/filestream/150139/field_highwire_adjunct_files/1/fetalneonatal-2014-307716supp_appendix2.docx)
Supplement: fetalneonatal-2014-307716supp_appendix2.docx [file fetalneonatal-2014-307716supp_appendix2.docx]

*Red cell and platelet transfusions in neonates: a population based study – Appendix 2*

*Diagnosis codes (International Classification of Diseases version 10, Australian Modification) and Procedure codes (Australian Classification for Health Interventions) for at-risk conditions in neonates*

| Condition | Codes |
| --- | --- |
| Severe fetal anaemia requiring in-utero transfusion | Procedure codes: 16609-00, 16612-00, 16615-00 in the maternal hospital records |
| Fetal blood loss | Diagnosis codes: P50.0, P50.1, P50.2, P50.3, P50.4, P50.5, P50.8, P50.9, P61.3 |
| Birth trauma with haemorrhage | Diagnosis codes: P10.0, P10.1, P10.3, P10.4, P10.8, P10.9, P12.2 |
| Hereditary red blood cell disorders | Diagnosis codes: D56, D57, D58, |
| Hereditary coagulation disorders | Diagnosis codes: D66, D67, D68.0, D68.1, D68.2, |
| Major congenital cardiac and non-cardiac abnormalities requiring surgery in the neonatal period involving opening of a body cavity | Procedure codes: 38218, 38270, 38456, 38475, 38480, 38481, 38488, 38489, 38509, 38556, 38559, 38588, 38600, 38603,  38618, 38640, 38653, 38656, 38700, 38706, 38712, 38715, 38727, 38733, 38739, 38742, 38745, 38751, 38754, 38757, 38763, 38766, 43909, 55130, 59900, 59903, 59921, 90202, 90210, 90222, 90223, 43837, 30601, 43915, 30527-01, 30527-03, 43801-00,  30601-00, 43843, 43852-00,  43903-00, 43900-00, 43855-00  38453-04, 38453-05, 38453-06,  38453-07, 90954-00, 43900-00, 43864, 43867, 43873, 43870-00,30375-19,  40103-00, 40100-00, 40003, 90224-00 |
| Haemolytic disorders | Diagnosis codes: P58,P61.4 p61.6 P55 P56 P57 D55.0 D75.1 P61.1  Diagnosis codes: O36.0,O36.1  In the maternal hospital records |
| Preterm birth | Birth before 37 weeks gestation |
| Assisted ventilation | Procedure codes: 13882 13857-0013879-00 22007 90179 |

Unless otherwise specified, codes refer to the infant hospital record
